1 **Two distinct bacterial biofilm components trigger**  
2 **metamorphosis in the colonial hydrozoan *Hydractinia echinata***

3

4 Huijuan Guo,<sup>1#</sup> Maja Rischer,<sup>1#</sup> Martin Westermann,<sup>2</sup> Christine Beemelmans<sup>1,\*</sup>

5 <sup>1</sup> *Leibniz Institute for Natural Product Research and Infection Biology – Hans Knöll Institute,*  
6 *Beutenbergstraße 11a, D-07745 Jena, Germany*

7 <sup>2</sup> *Electron Microscopy Centre, Friedrich Schiller University Jena, Ziegelmühlenweg 1, D-07743*  
8 *Jena, Germany*

9 # contributed equally

10 \* **Email:** [Christine.Beemelmans@hki-jena.de](mailto:Christine.Beemelmans@hki-jena.de) (ORCID 0000-0002-9747-3423)

11

12 **Classification**

13 Major: Chemical Sciences

14 Minor: Ecology

15 **Keywords**

16 *Hydractinia*, *Pseudoalteromonas*, metamorphosis, phospholipids, polysaccharides

17 **Author Contributions**

18 Conceptualization: M.R, H.G, M.W., C.B.; Methodology: M.R, H.G, M.W., C.B.; Investigations:  
19 M.R, H.G, M.W., C.B.; Resources: M.W., C.B.; Writing – Original Draft: M.R, H.G, C.B.  
20 Supervision and Funding Acquisition: M.W., C.B.

21 **This PDF file includes:**

22 Main Text

23 Figures 1 to 6

24

## 1 **Abstract**

2 Bacterial-induced metamorphosis of larvae is a widespread cross-kingdom communication  
3 phenomenon within the marine environment and critical for the persistence of many invertebrate  
4 populations. However, the chemical structures of the majority of inducing bacterial signals and the  
5 underlying cellular mechanisms remain enigmatic. *Hydractinia echinata* larvae transform upon  
6 detection of bacterial biofilm components into the colonial adult stage. Despite serving as cell  
7 biological model system for decades, the inducing bacterial signals remained undiscovered.  
8 Using a chemical-ecology driven analysis, we herein identified that specific bacterial  
9 (lyso)phospholipids and polysaccharides, naturally present in bacterial biofilms, elicit  
10 metamorphosis in *Hydractinia* larvae. While (lyso)phospholipids (e.g. 16:0LPG/18:1LPE, 16:0  
11 LPA/18:1LPE) as single compounds or in combinations induced up to 50% of all larvae to  
12 transform within 48 h, two structurally distinct polysaccharides, the newly identified Rha-Man  
13 polysaccharide from *Pseudoalteromonas* sp. P1-9 and curdlan from *Alcaligenes faecalis* caused  
14 up to 75% of all larvae to transform within 24 h. We also found combinations of  
15 (lyso)phospholipids and curdlan induced the transformation in almost all larvae within 24 h,  
16 thereby exceeding the morphogenic activity observed for single compounds and axenic bacterial  
17 biofilms. By using fluorescence-labeled bacterial phospholipids, we demonstrated their  
18 incorporation into the larval membranes, where interactions with internal signaling cascades  
19 could occur. Our results demonstrate that multiple and structurally distinct bacterial-derived  
20 metabolites converge to induce high transformation rates of *Hydractinia* larvae, which might  
21 ensure optimal habitat selection despite the general widespread occurrence of both compound  
22 classes.

23

## 24 **Significance Statement**

25 Bacterial biofilms profoundly influence the recruitment and settlement of marine invertebrates,  
26 critical steps for diverse marine processes such as coral reef formation, marine fisheries and the  
27 fouling of submerged surfaces. Yet, the complex composition of biofilms often makes it  
28 challenging to characterize the individual signals and regulatory mechanisms. Developing  
29 tractable model systems to characterize these ancient co-evolved interactions is the key to  
30 understand fundamental processes in evolutionary biology. Here, we characterized for the first  
31 time two types of bacterial signaling molecules that induce the morphogenic transition and  
32 analyzed their abundance and combinatorial activity. This study highlights the crucial role of the  
33 converging activity of multiple bacterial signals in development-related cross-kingdom signaling.

34

35

36

1 **Main Text**

2

3 **Introduction**

4 The radical transformation (metamorphosis) of planula larvae into the adult stage is a critical step  
5 in the life cycle of many marine species as it confers the propagation and persistence of the  
6 population in the marine ecosystem.<sup>1</sup> For more than 80 years it has been recognized that  
7 chemical signals present within marine bacterial biofilms induce or even prevent settlement and  
8 metamorphosis in benthic marine larvae,<sup>2-4</sup> but their identification remains still a challenging task  
9 due to low production levels and unestablished model systems. Hence, until today only very few  
10 key bacterial signals have been structurally characterized.<sup>5-7</sup> A prime example represents the  
11 bacterial product thallusin isolated from *Zobellia uliginosa*, which induces metamorphosis in the  
12 alga *Monostroma oxyspermum*.<sup>8</sup> Several members of the Polychaeta class and Cnidaria phylum  
13 have also served as model systems for bacterial-induced metamorphosis over decades.<sup>9,10</sup> In  
14 several studies, it was found that bromopyrroles produced by *Pseudoalteromonas* induce larvae  
15 of several coral species to undergo metamorphosis; however induced larvae failed to attach to  
16 surfaces when stimulated by bromopyrroles alone indicating that other, yet unidentified, chemical  
17 cues might be important for the morphogenic process.<sup>11,12</sup> Recent biochemical investigations of  
18 the bacteria-induced metamorphosis of the marine polychaete *Hydroides elegans* resulted in the  
19 identification of a phage tail-like contractile injection systems (tailocins) in *Pseudoalteromonas*  
20 species that induce settlement and metamorphosis by releasing an effector protein Mif1, which  
21 stimulates the P38 and MAPK signaling pathways.<sup>13-15</sup> However, bacteria not capable of  
22 producing these proteinaceous injection systems were also found to induce the transformation  
23 releasing additional, yet structurally not defined morphogens.<sup>16,17</sup> In the 1970s, Leitz and Wagner  
24 reported that a lipid-like molecule of *Pseudoalteromonas espejiana* (original name: *Alteromonas*  
25 *espejiana*) induces larvae transformation in *Hydractinia echinata*, an early branching metazoan  
26 lineage dating back more than 500 million years.<sup>18,19</sup> But despite intensive studies, the bacterial  
27 signals causing *Hydractinia* larvae to metamorphose have remained elusive. Instead,  
28 metamorphosis of *Hydractinia* was artificially induced using high salt concentrations (CsCl)  
29 allowing seminal studies on migratory stem cells, allorecognition (self-recognition), the canonical  
30 Wnt-signalling system, and the development of muscles and nervous systems.<sup>20,21</sup> However, it  
31 was noted from early on that artificial induction caused phenotypical and developmental  
32 differences in *Hydractinia* development compared to bacterial induction.<sup>22</sup>

33

34 The long-standing unsolved question about the structures of bacterial signals and the apparent  
35 morphological differences in larvae development between artificial and natural induction attracted  
36 our interest. Thus, we set out to solve the structures of the bacterial signals that induce  
37 metamorphosis in *Hydractinia*, which would allow us to shed light on the biochemistry underlying  
38 this ancient prokaryote-eukaryote signaling mechanisms.<sup>23</sup>

39

## 1 Results

### 2 Bioassay-guided identification of bacterial signals

3 To investigate which co-occurring bacteria induce metamorphosis in *H. echinata* (hereafter  
4 *Hydractinia*) we isolated morphological distinct co-occurring bacterial species from the surface of  
5 a healthy and freshly collected *Hydractinia* colony.<sup>24</sup> For a mono-species biofilm-based  
6 metamorphosis assay, we selected 29 representative bacterial isolates, including seven genome-  
7 sequenced *Hydractinia*-associated strains, one coral associated strain *Pseudoalteromonas* sp.  
8 PS5,<sup>11,12</sup> and eight bacterial type strains obtained from culture collections. Similar to previous  
9 observations, we observed the inconsistent timing of metamorphosis using biofilms compared to  
10 the artificial control (> 6 mM CsCl final concentration), presumably due the inhomogeneous  
11 nature of biofilms and spatial concentrations differences of the yet unidentified inducing signals in  
12 bacterial biofilms. To enable a comparative analysis of the inducing activity, we adopted the  
13 established stage-chart of morphological appearances by Leitz and coworkers to describe and  
14 calculate biofilm-induced rates of transformation (Figure S1).<sup>18,19</sup> In short, the percentage of  
15 larvae settlement includes only counts of larvae in morphological stages 9-11, and the  
16 percentage of complete metamorphosis includes only counts of larvae in morphological stages  
17 12-14. Based on these assessments, transformation rates are given as averaged percentage  
18 ranges in 10% step ranges, which are calculated from replicates of experiments performed with  
19 different larvae batches (different spawning events to ensure reproducibility of results).

20 As depicted in Figure 1, our bioassays resulted in the identification of five *Hydractinia*-associated  
21 bacterial strains that caused up to 60% of all larvae to undergo complete transformation to the  
22 primary polyp. Most notably, three strains (P1-9, P6-7, P1-29) rapidly induced the transformation  
23 reaching the morphological stages 13-14 within 24 h. Additional five strains were found to induce  
24 the transformation to stages 9-11 within the first 24 h, but subsequent development into the  
25 primary polyp was only observed within 48 h. In addition, we observed that up to eleven strains  
26 induced the transformation of larvae to morphogenic stage 9-11. However, neither of those  
27 strains induced the full transformation to the primary polyp leading eventually to the death of the  
28 transforming organism. In addition, six strains were found to be non-inducing and four strains  
29 caused the death of up to 100% of all larvae within 24 h. The results of this study suggested firstly  
30 that more than one structurally distinct bacterial signal might induce the transition and secondly  
31 that the mode of action might differ depending on the structure of secreted molecule. Amongst all  
32 tested strains, *Pseudoalteromonas* sp. P1-9 (referred from now on as P1-9) was found to induce  
33 the most robust morphogenic response and thus was selected for further chemical analysis  
34 (Figure 2).<sup>25-27</sup>

35  
36  
37  
38  
39

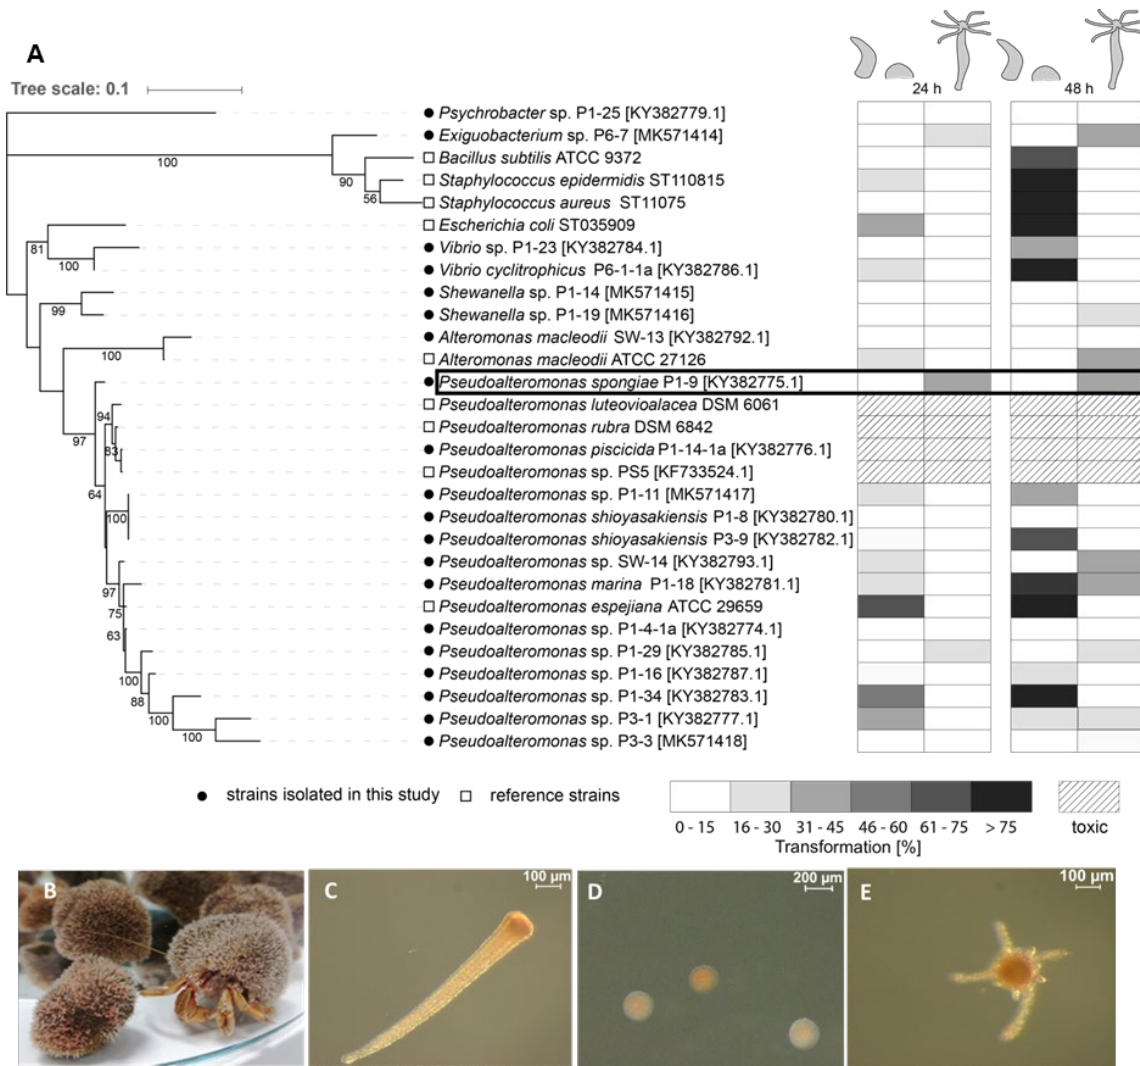

**Figure 1.** Assessment of morphogenic activity of selected bacterial strains. A) Left: phylogenetic tree based on 16S rRNA gene sequences of 29 tested bacterial strains. Best DNA model was generated and the robustness of interfered tree topologies was evaluated after 1000 bootstraps (> 50% are shown). Right: Heatmap depicts transformation percentage (stage 9-11 and 12-14) of *H. echinata* larvae counted after 24 and 48 h (negative control: ASW; positive control: CsCl). Transformation rates are given as averaged percentage ranges in 10% step ranges, which are calculated from replicates of experiments performed with different larvae batches. B) *Hydractinia echinata* colonizing the shell inhabited by a hermit crab (*Pagurus* sp.). C-E) Microscopic image of C) planula larva; D) initiation of morphogenic transformation by disc formation (morphological stage 9-10); E) formation of primary polyp (morphological stage 14).

To test if the morphogenic cue of P1-9 is a secreted and/or a diffusible small metabolite, we first tested solid-phase extracts (C18 cartridges) derived from liquid and plate cultures of P1-9. However, none of the tested solid-phase extracts showed morphogenic activities compared to living bacterial biofilms (positive control) (entry 3, Figure 2). We then tested if the signal is a

1 secreted high-molecular weight (HMW) biomolecule (e.g. protein, exopolysaccharides (EPS))  
 2 and/or part of the bacterial membranes.  
 3 Size exclusion based separation of culture supernatants and cell membrane fragments resulted in  
 4 the isolation of a HMW fraction (> 30 kDa) that showed remarkably high morphogenic activity in a  
 5 dose-response manner (entry 5). In contrast, low-molecular weight fractions (< 5 kDa) showed  
 6 only moderate to very low morphogenic activities (entry 6).  
 7

| Entry                                           | Substrate                                                   |  | Characteristics                          |
|-------------------------------------------------|-------------------------------------------------------------|-----------------------------------------------------------------------------------|------------------------------------------|
| 1                                               | Sea water control (ASW)                                     | –                                                                                 | Negative control                         |
| 2                                               | CsCl (6 mM)                                                 | ++                                                                                | Positive control                         |
| 3                                               | Bacterial cells from plate and liquid culture               | ++                                                                                | Part of cells or extracellular matrix    |
| 4                                               | Solid phase (C-18) extracts of culture supernatants         | –                                                                                 | No secreted small molecule               |
| 5                                               | Size exclusion filtration of culture supernatants (> 30 DA) | ++                                                                                | Part of membrane or extracellular matrix |
| 6                                               | Size exclusion filtration of culture supernatants (< 5 kDa) | +                                                                                 | Non secreted small molecule              |
| 7                                               | Outer membrane vesicles and/or membrane layers              | ++                                                                                | Bound to cells or extracellular matrix   |
| 8                                               | EPS Isolation                                               | ++                                                                                | Extracellular polysaccharides            |
| <b>Treatment of bacterial membrane fraction</b> |                                                             |                                                                                   |                                          |
| 9                                               | DNase I                                                     | ++                                                                                | No DNA                                   |
| 10                                              | RNase A                                                     | ++                                                                                | No RNA                                   |
| 11                                              | Proteinase K                                                | ++                                                                                | No proteins                              |
| 12                                              | Heating at 90°C                                             | ++                                                                                | Heat resistant                           |
| 13                                              | 6 M NaOH, 30 °C, 12 h                                       | ++                                                                                | Base stable - soluble                    |
| 14                                              | 6 M HCl, 30 °C, 12 h                                        | ++                                                                                | Partial acid stable                      |
| 15                                              | 6 M HCl, 60 – 90 °C, 12 h                                   | –                                                                                 | Hydrolysis                               |
| <b>Extraction of cell membrane</b>              |                                                             |                                                                                   |                                          |
| 15                                              | H <sub>2</sub> O                                            | +                                                                                 | Water soluble                            |
| 16                                              | CHCl <sub>3</sub> or cyclohexane                            | +                                                                                 | small molecule – part of cell membrane   |
| 17                                              | Ethylacetate                                                | ++                                                                                |                                          |
| 17                                              | MeOH/CHCl <sub>3</sub>                                      | ++                                                                                | Polar lipids                             |

8  
 9 **Figure 2.** Morphogenesis assay of biosamples derived from P1-9. Transformation rates to  
 10 morphological stages 12-14 were calculated from replicates of experiments performed with  
 11 different larvae batches after 48 h (– (no induction); + (< 40%; low induction); ++ (> 40% high  
 12 induction).  
 13

14 Enrichment of outer membrane vesicles and mini cells from culture supernatants by  
 15 ultracentrifugation induced high transformation rates already within the first 24 h resulting in fully  
 16 transformed larvae after 48 h (entry 7). Thus, we reasoned that the morphogenic cues might be  
 17 part of the outer cell membrane and/or of high molecular weight. To determine the stability of the  
 18 morphogens and to optimize purification methods, we subjected the active HMW fractions (> 30

1 kDa) to enzymatic and physical treatments and tested the morphogenic response after treatment.  
2 As depicted in Figure 2, activity was completely retained when samples were treated with  
3 digestive enzymes such as DNase, RNase, or proteinase K, or even when heated to 96 °C for  
4 10 min (entries 9-12). Treatment of the active fraction with aqueous 6 M NaOH or 6 M HCl (12 h,  
5 30 °C) partially solubilized the active morphogen (entry 13, 14), and activity of both, soluble  
6 fraction and residue, was mostly retained after neutralization. However, treatment with 6 M HCl at  
7 higher temperatures (> 60 °C) gradually abolished the morphogenic activity of the sample. Based  
8 on these tests, we deduced that the morphogen(s) was neither a sensitive protein, nucleic acid  
9 nor an instable secreted metabolite. Morphogens were also extractable from the bacterial  
10 membranes and methanolic extracts showed indeed the highest morphogenic activity (entry 17,  
11 18), while aqueous extracts retained only moderate activity (entry 15). Taken together, our results  
12 indicated that presumably two different bacterial morphogens are produced by P1-9, which are  
13 stable and extractable and likely localized within or at the bacterial outer membrane.  
14

### 15 Analysis of morphogenic phospholipids

16 In a next step, we sought to characterize the morphogenic cues and applied a bioassay-guided  
17 reverse-phase column chromatography (HPLC) purification protocol. The resulting active HPLC  
18 fractions were analyzed by high-resolution tandem mass spectrometry (HR-MS<sup>2</sup>) and Global  
19 Natural Product Social Molecular Networking (GNPS)<sup>28</sup> analysis revealing the dominant presence  
20 of different phosphatidylglycerol (PG) and phosphatidylethanolamine (PE) species and the  
21 respective lyso derivatives (LPG, LPE). Due to inherent difficulties associated with the purification  
22 of structurally closely related phospholipids, we purchased eleven commercial derivatives that  
23 matched the proposed derivatives to compare the LC-HRMS<sup>2</sup> pattern (Figure S12-S17), as well  
24 as <sup>1</sup>H and <sup>13</sup>C nuclear magnetic resonance (NMR) spectra (chemical shifts and coupling  
25 constants) (S28-S52).

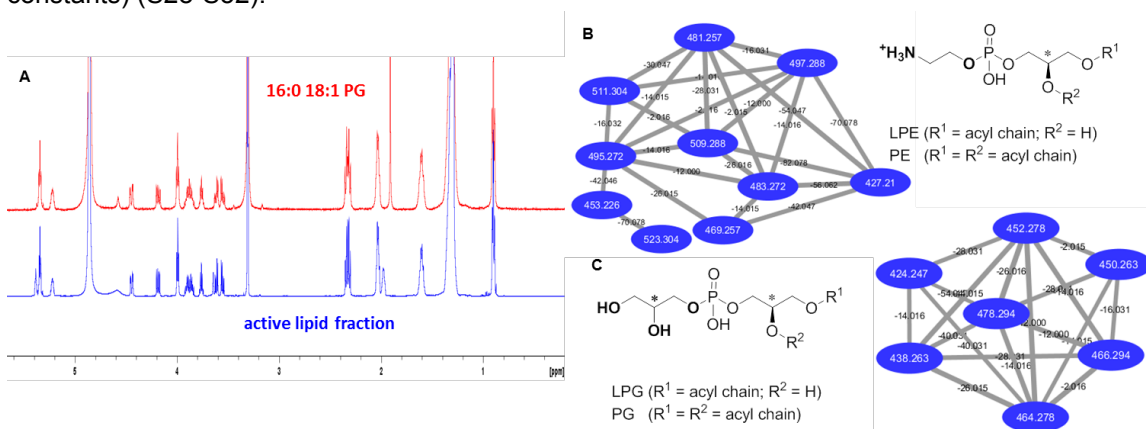

26  
27 **Figure 3.** A) <sup>1</sup>H-NMR spectra of commercial 16:0-18:1 PG (red) and morphogenic PG/LPG  
28 enriched fraction (blue). B-C) LC-HRMS<sup>2</sup> based GNPS analyses of purified lipid fraction showing  
29 the B) LPE and C) LPG MS<sup>2</sup>-cluster.  
30  
31

1 We then confirmed the morphogenic activity of commercial phospholipids including two  
2 derivatives containing fluorescence labels (Figure 4) using 25 and 50  $\mu\text{M}$  as final lipid  
3 concentrations (based on preliminary dose-response tests using lipid extracts and commercial  
4 16:0 LPG (Figure S15)). Here, it is noteworthy that phospholipid concentrations of single lipids or  
5 combination thereof exceeding 50  $\mu\text{M}$  occasionally caused the lysis of the organism (Figure 4).  
6 Transformation rates were determined after 24 and 48 h, respectively; however statistical  
7 analyses of assay data was not performed at this stage as induction by phospholipids resulted in  
8 a non-synchronized behavior of larval transformation, similar to the observation made in axenic  
9 biofilm assays. However, none of the tested single phospholipids recapitulated the full activity  
10 observed for enriched phospholipid fractions derived from P1-9, but derivatives 16:0 LPG, 18:0  
11 PE, and 16:0 (lyso)phosphatidic acid (16:0 LPA and 16:0 PA) repeatedly induced metamorphosis  
12 in moderate to good rates (20-40%).

13 At this stage we questioned if the low solubility of (lyso)phospholipids might prevent the uptake  
14 and perception by *Hydractinia*. Thus, we treated competent larvae with nitrobenzoxadiazole  
15 (NBD)-labeled (phospho)lipids (18:1-12:0 NBD PG, 18:1-12:0 NBD PE or 12-NBD stearate  
16 (Table S3), 25 nmol/mL) and found that all lipids were incorporated into the larvae membrane  
17 within five hours and both phospholipid derivatives. While 12-NBD stearate did not induce  
18 transformation to the primary polyp, 18:1-12:0 NBD PG and PE were found similarly active as  
19 unmodified phospholipids (Figure 4). Here, it was noted that during metamorphosis the  
20 fluorescence signal continuously decreased over time, presumably due to internalization and  
21 decomposition of phospholipids during transformation processes (Figure 4, Table S3). Thus, it  
22 was concluded at this stage that induction of metamorphosis by bacterial-derived phospholipids  
23 presumably occurs by passive uptake of lipids into the larvae membrane, is strongly structure-  
24 and concentration dependent and presumably orchestrated by *Hydractinia*-internal feedback-  
25 loops.

26 Phospholipids (PL) and lysophospholipids (lyso-PLs, LPLs) are ubiquitous components of  
27 bacterial cell walls and determine e.g. cell integrity and morphology as well as pathogen-host  
28 interactions.<sup>29,30</sup> However, little details are known about their possible signaling functions in  
29 bacteria.<sup>31</sup> As bacterial membranes and outer membrane vesicles (OMVs) are composed of  
30 species-specific mixtures of (lyso)phospholipids, we hypothesized that the natural phospholipid  
31 compositions of cells and bacterial biofilms will dictate the morphogenic activity and that additive  
32 or even synergistic effects may play an important role in the induction process.

33



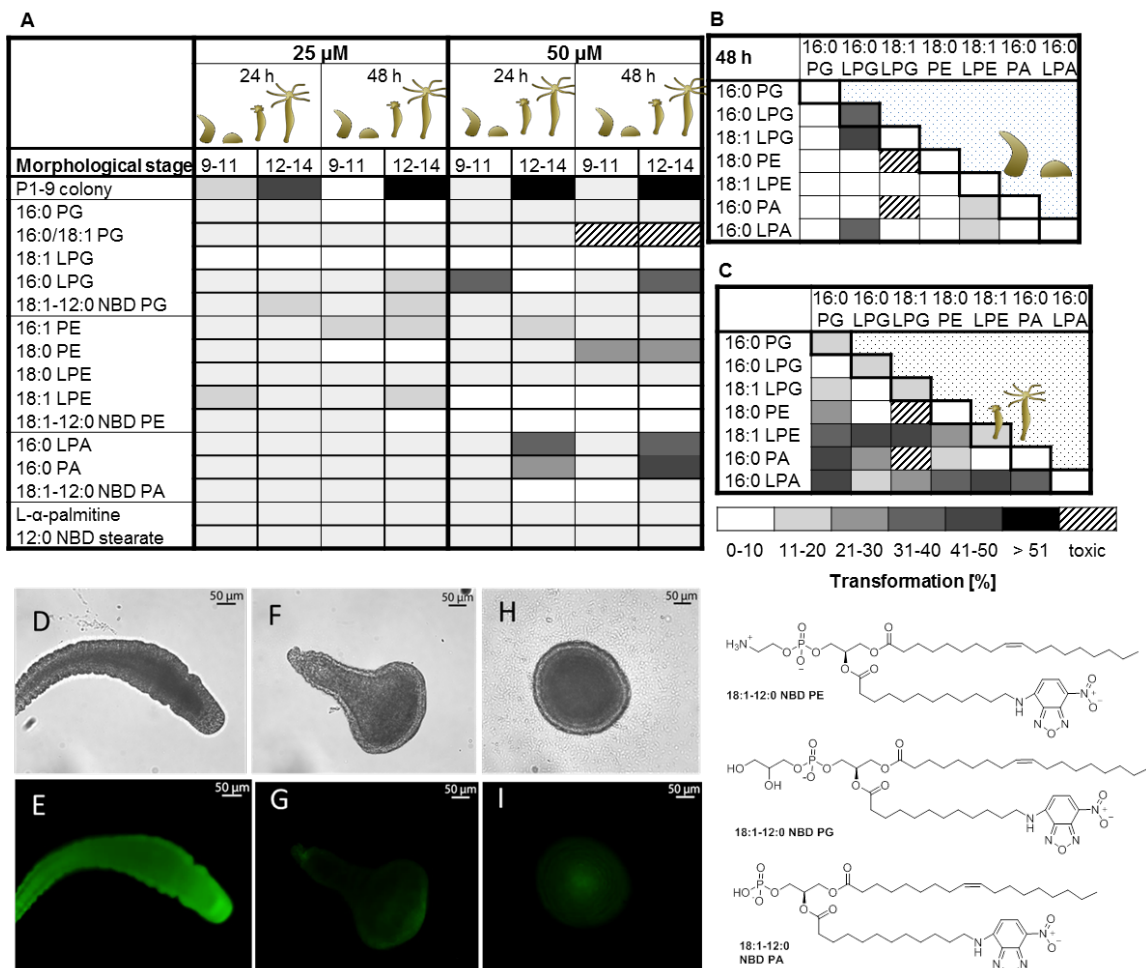

1  
2 **Figure 4.** Metamorphosis inducing activity of commercial phospholipids. Transformation rates are  
3 given as averaged percentage ranges in 10% step (calculated from replicates of experiments  
4 performed with different larvae batches). Negative control: ASW; positive control: CsCl. A)  
5 Bioactivity test were performed using 25 and 50  $\mu$ M final lipid concentrations. Transformation  
6 rates to morphological stage 9-11 and stage 12-14 were determined after 24 and 48 h. B-C)  
7 Activity tests of phospholipid combinations (25  $\mu$ M of each lipid in a 1:1 combination with a final  
8 lipid concentration of 50  $\mu$ M). Transformation rates to morphological stages 9-11 (B) and stages  
9 12-14 (C) were determined after 48 h. D-K) Fluorescence labeling images of larvae treated with  
10 (D, E) 18:1-12:0-NBD PE; (F, G) 18:1-12:0-NBD PA; (H-I) 18:1-12:0 NBD PG undergoing  
11 metamorphosis (fluorescence imaging with emission wavelength at 527 nm).

12  
13 Thus, we tested enriched phospholipid extracts (125  $\mu$ g/mL lipid extract) of 16 different  
14 *Hydractinia*-associated bacterial strains including strains that were found inactive in biofilm  
15 assays for morphogenic activity (Figure S13). Indeed, extracts of several different strains (P1-23,  
16 SW13, P1-9, *P. rubra*, P3-9, P1-4-1a, P1-16) induced the transformation to the primary polyp  
17 (stage 12-14) in moderate to good rates within 48 h, in part exceeding the results of our previous  
18 biofilm experiments (Figure 1, S13). In contrast, lipid extracts of four strains caused cell lysis  
19 and/or abnormal transformations at the tested concentration, presumably due to the presence of  
20 overall toxic phospholipid concentrations or known cytotoxic (hydrophobic) natural products

1 (violacein and/or poly-brominated pyrrole derivatives) naturally present within the bacterial cells  
2 and membranes of the producing organisms. We also analyzed the phospholipid composition of  
3 cell extracts by comparative high resolution tandem mass spectrometry (HRMS<sup>2</sup>) and found a  
4 species-specific abundance of phospholipids that only in part resembled the composition of our  
5 model strain P1-9. Despite the absence of detectable amounts of (L)PA derivatives, we  
6 hypothesized that the combination of several weakly active (L)PE and (L)PG might be  
7 responsible for the observed clear activity. To corroborate these findings, we then conducted  
8 combination assays of a defined subset of phospholipids (50 µM final concentrations). Indeed,  
9 several tested phospholipid combinations showed additive or even synergistic tendencies to  
10 induce metamorphosis within 48 h, in particular the combinations of 18:1 LPE/16:0 LPG, 18:1  
11 LPE/18:1 LPG, 16:0 PA/16:0 PG, 16:0 LPA/16:0 LPG and 16:0 LPA/18:1 LPE (Figure 4). At this  
12 stage we concluded that specific (lyso) phospholipids and combinations thereof, known to be  
13 present in bacterial cell membranes and OMVs, are in part responsible for metamorphosis of  
14 *Hydractinia* larvae.

15

#### 16 **Analysis of morphogenic polysaccharide**

17 As depicted in Figure 2, our bioassay-guided analysis indicated the presence of a second type of  
18 morphogenic compound of high-molecular weight (HMW, > 10kDa in size) and naturally present  
19 within aqueous extracts of *Pseudoalteromonas* P1-9 biofilms (Figure S9). Thus, we enriched for  
20 the secreted bioactive compound by size-exclusion filtration and analyzed the most active  
21 fractions by <sup>1</sup>H NMR, which revealed a complex mixture of yet unknown polysaccharides  
22 (Figure S21). Further purification (Sephadex G25, eluted with 0.1% NH<sub>4</sub>OH) and semi-  
23 preparative HPLC (Shodex) and NMR and HRMS analysis of the most active fraction (> induction  
24 of 20%) revealed the presence of a polysaccharide consisting of repeating -(1'→4)-α-L-Rha-  
25 (1→3')-D-Man- units (> 10 kDa, Figure 5, Figure S19-S27). The rhamnose/mannose composition  
26 was confirmed by acid hydrolysis using 6 M HCl, followed by TMS derivatization and GC-MS  
27 analysis and comparison with commercial standards (Figure S18). The purified polysaccharide,  
28 from now on named Rha-Man, showed a clear dose-dependent morphogenic induction of up to  
29 80% transformation within 48 h (> 150 µg/mL, Figure S19). Partial acid hydrolysis resulted in loss  
30 of morphogenic activity. At this stage, we also tested rhamnose and glucose monomers at  
31 different concentrations, but no induction was observed. Comparative NMR-analysis of bioactive  
32 size-exclusion fractions revealed that Rha-Man was only a minor component of the highly  
33 bioactive polysaccharide fraction, which pointed towards additional not-yet structurally  
34 characterized P1-9-specific exopolysaccharides (EPS) derivatives with morphogenic properties  
35 (Figure S21).

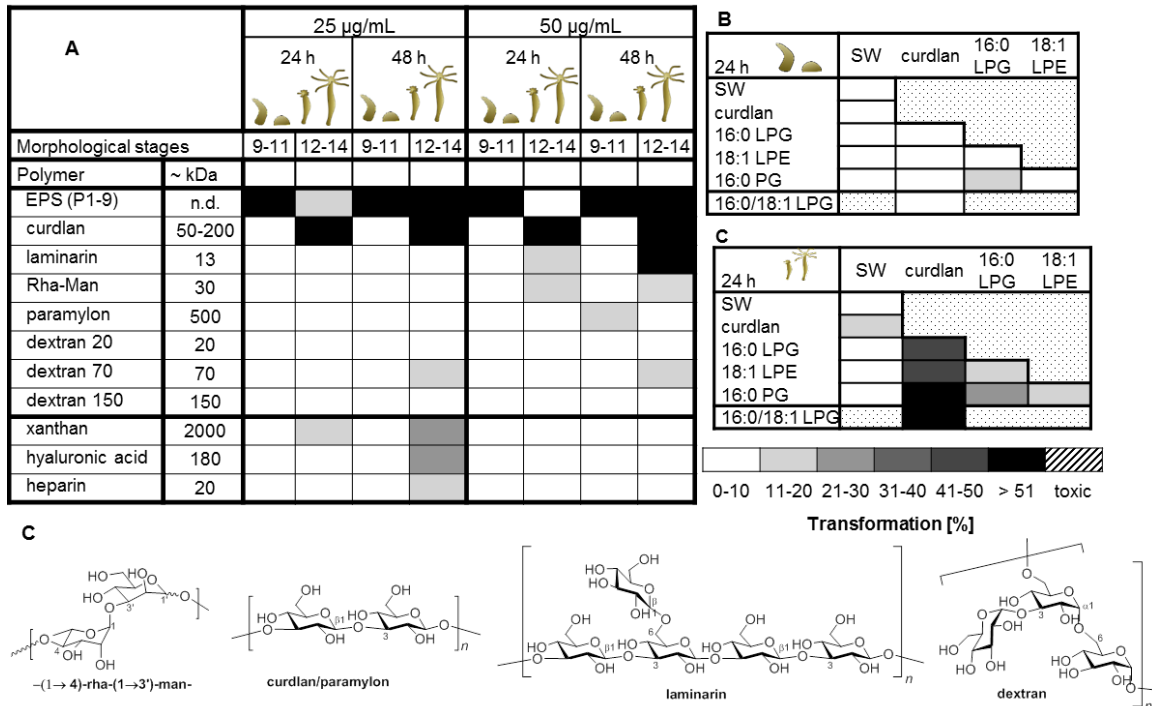

**Figure 5.** Metamorphosis inducing activity of enriched and purified polysaccharides from P1-9 and commercial polysaccharides. Transformation rates are given as averaged percentage ranges in 10% step (calculated from replicates of experiments performed with different larvae batches). Negative control: ASW; positive control: CsCl. A) Bioactivity test were performed using (25 µg/mL) and transformation rates to morphological stage 9-11 and stage 12-14 were determined after 24 and 48 h, respectively. B-C) Bioactivity tests of phospholipids (10 µg per lipid) and curdlan combinations and 15 µg curdlan) were assessed after 24 h. D) Structures of repeating units of morphogenic polysaccharides.

Due to the inherent difficulties associated with the structural characterization of EPS in general and from P1-9 in particular, we decided to examine structure-function relations using structurally defined and more widely distributed bacterial polysaccharides (charged and non-charged). Intriguingly, curdlan, a well-known polysaccharide (50-200 kDa) with  $\beta$ -1,3-glycosidic linkage and produced by the Gram-negative bacterium *Alcaligenes faecalis*, induced at significant lower dosage (25 µg/mL) the transformation to the primary polyp within 24 h (Figure 5). In contrast, paramylon, the 500 kDa derivative of curdlan, which differs in its average length and three-dimensional structure,<sup>32</sup> induced the transformation only in moderate to low percentage. Other EPS derivatives, in particular charged EPS (hyaluronic acid and heparin), induced only in very low rates or were even toxic to larvae (Figure 5); secondary effects due to acidic/ionic properties cannot be excluded for these derivatives. At this step, we concluded that *Hydractinia* larvae respond in a dose-dependent fashion to the presence of two structurally distinct EPS derivatives and fully developed primary polyp (> 50% transformation rates) within 24-48 h.

1 We then tested if phospholipids and the identified polysaccharides induced morphogenesis in an  
2 additive or synergistic manner as both compound types co-occur within the bacterial biofilm.  
3 Thus, we tested combinations of moderately active lysophospholipids, 16:0 LPG and 18:1 LPE,  
4 as well as curdlan using lower concentration of individual compounds (10 and 15  $\mu\text{g}/\text{mL}$ ,  
5 respectively). As expected, curdlan showed dose-dependent activity and induced transformation  
6 to the primary polyp at lower rates compared to 25 and 50  $\mu\text{g}/\text{mL}$ . Intriguingly, combinations of  
7 curdlan with either 16:0 LPG, or 18:1 LPE, or both derivatives resulted in almost 100%  
8 transformation rates within 24 h, which indicated towards synergistic (more than additive)  
9 activities. In addition, we also observed that larvae triggered by the combination of natural  
10 inducers developed more rapidly and cleanly into a fully functional primary polyp compared to  
11 artificial induction.

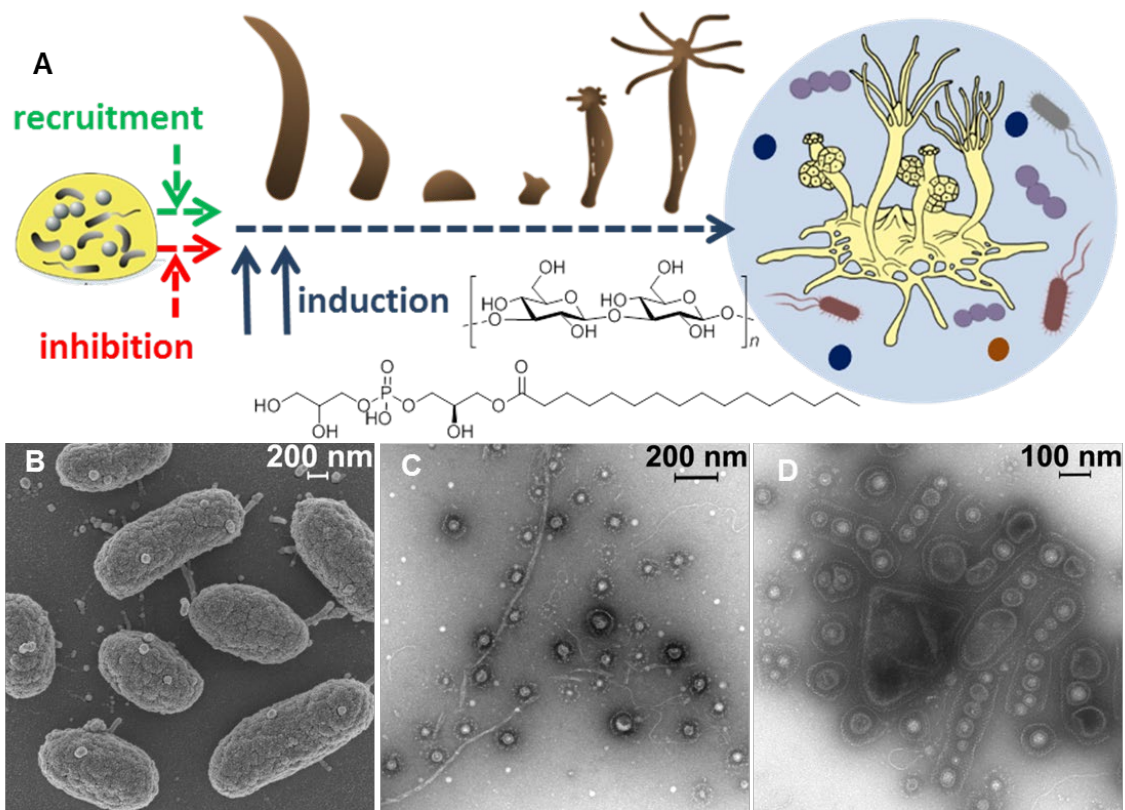

12  
13  
14  
15  
16  
17  
18  
19  
20  
21  
22

**Figure 6.** Specific phospholipids, naturally present in bacterial cells and outer membrane vesicles, and exopolysaccharides induce metamorphosis in *H. echinata*. A) Components of bacterial biofilms recruit and induce metamorphosis of competent *H. echinata* larvae; or prevent the transformation by killing larvae by secretion of toxic compounds. B) Scanning electron microscopy of single cells of P1-9 obtained from a three day old liquid culture. C-D) Negative contrast electron microscopic image of vesicles coated with S-layer like matrix and string-shaped biopolymers isolated from a three day old liquid culture of P1-9 (C) and agar plate derived P1-9 biofilm (D).

1 The lipophilic nature of phospholipids and insolubility of polysaccharides raised the question of  
2 how the bacterial signaling molecules are sensed and perceived by *Hydractinia*. In recent years  
3 evidence has been mounting that extracellular (or outer membrane) vesicles (OMVs) represent a  
4 highly conserved feature and potential mechanisms/vehicles of lipophilic signaling molecules that  
5 orchestrate the interaction between bacteria and marine eukaryotes.<sup>33-35</sup> To assess if P1-9  
6 produces OMVs, we performed electron microscopy (TEM) imaging of shaking and static cell  
7 cultures. Examinations of TEM images revealed entire cells and cells proliferating what appears  
8 to be outer membrane vesicles (100-300 nm, Figure 6). Interestingly, (cryo)TEM imaging of  
9 aqueous extracts of P1-9 biofilms and liquid culture revealed a high abundance of numerous  
10 extracellular vesicles of different sizes and forms (Figure 6A,C,D) as well as high abundances of  
11 biopolymer fibers (Figure 6B,C), which were positively tested for high morphogenic induction  
12 (Figure 2). Thus, it can be concluded at this stage that morphogens are naturally present within  
13 the biofilm matrix and are likely detected in form of OMVs and/or bacterial cell envelopes.

14

## 15 Discussion

16 We successfully identified two types of bacterial morphogenic cues, a subset of  
17 (lyso)phospholipids and two bacterial polysaccharides (Rha-Man, curdlan) from gram-negative  
18 bacteria that induce the morphogenic transformation of *Hydractinia* planula larva into the primary  
19 polyp. Detailed structure-activity studies of both compound types revealed a strong concentration  
20 and structure-dependency of the morphogenic response. In case of phospholipids, 18:0 PE, 16:0  
21 LPG and 16:0 LPA/PA showed the highest induction levels as single compounds and in  
22 combination with other lipids, while other phospholipid combinations were found to be inactive or  
23 even toxic to the larvae. Subsequent bioassays of phospholipid-rich bacterial extracts further  
24 indicated that the overall compositions dictates the final morphogenic response and effects could  
25 be overruled by the presence of toxic metabolites leading to abnormal or incomplete  
26 transformation or even death of the larvae. In case of polysaccharides, a P1-9 derived Rha-Man  
27 polysaccharide and *A. faecalis*-derived curdlan were found to induce the full transformation in a  
28 dose-response fashion with curdlan being the more active derivative. Intriguingly, combinations of  
29 phospholipids and curdlan induced the full morphogenic transition at rates exceeding in part the  
30 sum of single compound contributions and resulting in the complete transformation of almost all  
31 larvae within 24 h. Although, only representative derivatives of both bacterial compound classes  
32 were investigated in this study, the results are of crucial importance for future research directions  
33 in all facets for the following reasons:

34 Firstly, the structure, concentration and combination-dependency of the morphogenic response  
35 hints towards species-specific cross-kingdom interactions that might allow for the optimal habitat  
36 selection, despite the general global abundance of both compound classes in the bacterial  
37 world.<sup>36-38</sup> Here, it can be speculated that only specific bacterial biofilm compositions, which  
38 induce the full transformation within less than 24 h, presumably enhance the likelihood of survival  
39 of the individual larvae in highly competitive environments. Thus, our study will guide future

1 investigations into the beneficial microbiome and the long-term survival of naturally-induced  
2 *Hydractinia* colonies.

3 Secondly, our studies pave the way to examine additive and synergistic behavior of different  
4 bacterial signals that trigger animal signaling systems. Only few studies have so far focused on  
5 synergistic effects of morphogens in the marine environment,<sup>4-7</sup> which includes studies on  
6 sulfonolipids (RIFs) and LPEs, that in combination induce the formation of predatory rosette-like  
7 stage of the choanoflagellate *S. rosetta*,<sup>39-41</sup> and the recent identification of synergistically acting  
8 nucleobases from marine bacteria, that induce metamorphosis of the invasive fouling mussel  
9 *Mytilopsis sallei*.<sup>42</sup> However, detailed mechanistic studies about mode of perception and  
10 synergism in most model systems are thoroughly missing.

11 Thirdly, the identification of a novel polysaccharide and the detection of other morphogenic, yet  
12 uncharacterized derivatives, encourages research directed towards the elucidation of their  
13 biosynthetic pathways and regulation and might enable their future structure elucidation and  
14 biosynthetic engineering.<sup>43-45</sup>

15 Fourthly, for *Hydractinia* it has been proposed from early on that neurosensory cells dominantly  
16 located at or near the anterior pole and in part on its tapered posterior tip are responsible for the  
17 detection of the bacterial cues.<sup>19,20</sup> Upon physical contact with lipid-rich vesicles and cell  
18 fragments naturally present within marine biofilms, phospholipids could passively integrate into  
19 the *Hydractinia* membrane; a hypothesis that is supported by our findings that fluorescence-  
20 labeled phospholipids are quickly integrated into membranes of *Hydractinia* larvae. Once  
21 integrated, specific phospholipids could act as ligands for certain receptors or induce changes in  
22 membrane fluidity resulting in the recruitment of, e.g., PKC involved in cellular signaling  
23 processes.<sup>46-48</sup> In addition, LPAs have been recognized as potent mitogen in humans since  
24 decades due to their interactions with G-protein-coupled receptors (GPCRs), thereby altering  
25 many different cellular responses in humans, such as proliferation, survival, cytoskeletal changes  
26 or calcium influx.<sup>49</sup> Thus, a homologous mode of action could be hypothesized for *Hydractinia*. In  
27 contrast, morphogenic EPS molecules presumably require detection via dedicated receptors as  
28 described for EPS-mediated host-pathogen interactions.<sup>50,51</sup> In particular curdlan has been  
29 previously reported to act on lectin-type receptors in humans; a receptor-type, which have also  
30 been detected in a *Hydractinia* transcriptome study.<sup>52</sup>

31 In summary, the results of our studies will allow us to establish *Hydractinia* as a model system to  
32 investigate more closely host-microbe interactions and will guide future research on molecule-  
33 receptor interactions. Our results also open several avenues for future studies on other aspects of  
34 how bacterial signals trigger animal development in the marine world, which could have potential  
35 practical applications for preventing biofouling, coral reef management and aquaculture  
36 husbandry.

37  
38

1 **Materials and Methods**

2 Supplementary Information (SI) available: details on fermentation, cultivation, bioassays, isolation  
3 procedures, ESI-HRMS, <sup>1</sup>H NMR, <sup>13</sup>C NMR, and 2D NMR spectra as well as additional assay  
4 data.

5

6 **Acknowledgments**

7 We are grateful for financial support from the German Research Foundation (DFG, CRC1127  
8 ChemBioSys, BE 4799/2-1). CB greatly acknowledges funding by the ERC (ERC Grant number:  
9 802736, MORPHEUS). MR is generously supported by the Jena School for Microbial  
10 Communication (JSMC, DFG). Mrs. Heike Heinecke (HKI) for recording NMR spectra, Mrs.  
11 Andrea Perner (HKI) for HRMS measurements, Toni Neuwirth for GC-MS measurements and  
12 Johan Kufs for assisting in fluorescence imaging. We also would like to thank Prof. Valerie Paul  
13 for the generous supply of *Pseudoaltermonas* sp. P5, and Theresa Jautzus for critical comments  
14 on the manuscript. We are very grateful for the support by the Alfred-Wegner Sylt team and Ms  
15 Birgit Hüssel for their hospitality during field work.

16

17 **Conflict of interest statement**

18 The authors declare no conflict of interest.

19

20

21

22

## 1 References

- 2 1. M.-G. Hadfield, V.-J. Paul, "Natural chemical cues for settlement and metamorphosis of  
3 marine invertebrate larvae" in Marine Chemical Ecology, J.-B. McClintock, B.-J. Baker,  
4 Eds. (CRC Press LLC, 2001), pp. 431-461.
- 5 2. C.-E. Zobell, E.-C. Allen, The Significance of Marine Bacteria in the Fouling of  
6 Submerged Surfaces. *J. Bacteriol.* **29**, 239-251 (1935).
- 7 3. A.-M. Cantley, J. Clardy, Animals in a bacterial world: opportunities for chemical ecology.  
8 *Nat. Prod. Rep.* **32**, 888–892 (2015).
- 9 4. T. Wichard, C. Beemelmans, Role of chemical mediators in aquatic interactions across  
10 the prokaryote eukaryote boundary. *J. Chem. Ecol.* **44**, 1008-1021 (2018).
- 11 5. M.-G. Hadfield, Biofilms and marine invertebrate larvae: what bacteria produce that  
12 larvae use to choose settlement sites. *Annu. Rev. Mar. Sci.* **3**, 453-470 (2011).
- 13 6. A. Woznica, N. King, Lessons from simple marine models on the bacterial regulation of  
14 eukaryotic development. *Curr. Opin. Microbiol.* **43**, 108-116 (2018).
- 15 7. M. McFall-Ngai, M.-G. Hadfield, T.-C. Bosch, H.-V. Carey, T. Domazet-Lošo, A.-E.  
16 Douglas, N. Dubilier, G. Eberl, T. Fukami, S.-F. Gilbert, U. Hentschel, N. King, S.  
17 Kjelleberg, A.-H. Knoll, N. Kremer, S.-K. Mazmanian, J.-L. Metcalf, K. Nealson, N.-E.  
18 Pierce, J.-F. Rawls, A. Reid, E.-G. Ruby, M. Rumpho, J.-G. Sanders, D. Tautz, J.-J.  
19 Wernegreen, Animals in a bacterial world, a new imperative for the life sciences. *Proc.*  
20 *Natl. Acad. Sci. USA.* **110**, 3229–3236 (2013).
- 21 8. Y. Matsuo, H. Imagawa, M. Nishizawa, Y. Shizuri, Isolation of an algal morphogenesis  
22 inducer from a marine bacterium. *Science.* **307**, 1598 (2005).
- 23 9. J.-D. Zardus, B.-T. Nedved, Y. Huang, C. Tran, M.-G. Hadfield, Microbial biofilms  
24 facilitate adhesion in biofouling invertebrates. *Biol. Bull.* **214**, 91-98 (2008).
- 25 10. S. Dobretsov, R.-M. Abed, M. Teplitski, Inhibition of biofouling by marine microorganisms.  
26 *Biofouling.* **29**, 423-441 (2013).
- 27 11. J.-M. Sneed, K.-H. Sharp, K.-B. Ritchie, V.-J. Paul, The chemical cue tetrabromopyrrole  
28 from a biofilm bacterium induces settlement of multiple Caribbean corals. *Proc Biol Sci.*  
29 **281**, 20133086 (2014).
- 30 12. J. Tebben, D.-M. Tapiolas, C.-A. Motti, D. Abrego, A.-P. Negri, L.-L. Blackall, P.-D.  
31 Steinberg, T. Harder, Induction of larval metamorphosis of the coral *Acropora millepora*  
32 by tetrabromopyrrole isolated from a *Pseudoalteromonas* bacterium. *PLoS One.* **29**, 6,  
33 e19082 (2011).
- 34 13. N.-J. Shikuma, M. Pilhofer, G.-L. Weiss, M.-G. Hadfield, G.-J. Jensen, D.-K. Newman,  
35 Marine tubeworm metamorphosis induced by arrays of bacterial phage tail-like structures.  
36 *Science* **343**, 529-533 (2014).
- 37 14. N.-J. Shikuma, I. Antoshechkin, J.-M. Medeiros, M. Pilhofer, D.-K. Newman, Stepwise  
38 metamorphosis of the tubeworm *Hydroides elegans* is mediated by a bacterial inducer  
39 and MAPK signaling. *Proc Natl Acad Sci U S A.* **113**, 10097-10102 (2016).
- 40 15. C.-F. Ericson, F. Eisenstein, J.-M. Medeiros, K.-E. Malter, G.-S. Cavalcanti, R.-W. Zeller,  
41 D.-K. Newman, M. Pilhofer, N.-J. Shikuma, A contractile injection system stimulates  
42 tubeworm metamorphosis by translocating a proteinaceous effector. *eLife.* **8**, e46845  
43 (2019).
- 44 16. M. L. Freckelton, B. T. Nedved, Y.-S. Cai, S. Cao, H. Turano, R. A. Alegado, M. G.  
45 Hadfield; bioRxiv preprint first posted online Nov. 29, 2019; doi:  
46 <http://dx.doi.org/10.1101/851519>
- 47 17. M.-L. Freckelton, B.-T. Nedved, M.-G. Hadfield, (2017). Induction of invertebrate larval  
48 settlement; different bacteria, different mechanisms? *Sci. Rep.* **7**, 42557 (2017).
- 49 18. T. Leitz, T. Wagner, The marine bacterium *Alteromonas espejiana* induces  
50 metamorphosis of the hydroid *Hydractinia echinata*. *Mar. Biol.* **115**, 173-178 (1993).
- 51 19. S. Seipp, J. Schmich, T. Kehrwald, T. Leitz, Metamorphosis of *Hydractinia echinata*—  
52 natural versus artificial induction and developmental plasticity. *Dev. Genes. Evol.* **217**,  
53 385-394 (2007).



- 1 20. U. Technau, R.-E. Steele, Evolutionary crossroads in developmental biology: Cnidaria.  
2 *Development*, **138**, 1447–1458 (2011).
- 3 21. M. Steven, Sanders, Z. Ma, J. M. Hughes, B. M. Riscoe, G. A. Gibson, A. M. Watson, H.  
4 Flici, U. Frank, C. E. Schnitzler, A. D. Baxevanis, M. L. Nicotra, CRISPR/Cas9-mediated  
5 gene knocking in the hydroid *Hydractinia symbiolongicarpus*. *BMC Genomics*. **19**, 649  
6 (2018).
- 7 22. M. Kroihner, S. Berking, On natural metamorphosis inducers of the cnidarians *Hydractinia*  
8 *echinata* (Hydrozoa) and *Aurelia aurita* (Scyphozoa). *Helgol. Mar. Res.* **53**, 118-121  
9 (1999).
- 10 23. T. Schneider, T. Leitz, Protein kinase C in hydrozoans: involvement in metamorphosis of  
11 Hydractinia and in pattern formation of Hydra. *Roux's arch. dev. biol.*, **203**, 422-428  
12 (1994).
- 13 24. H. Guo, M. Rischer, M. Sperfeld, C. Weigel, K.-D. Menzel, J. Clardy, C. Beemelmans,  
14 Natural products and morphogenic activity of  $\gamma$ -Proteobacteria associated with the marine  
15 hydroid polyp *Hydractinia echinata*. *Bioorg. Med. Chem.* **25**, 6088-6097 (2017).
- 16 25. J.-L. Klassen, T. Wolf, M. Rischer, H. Guo, E. Shelest, J. Clardy, C. Beemelmans, Draft  
17 Genome Sequences of Six *Pseudoalteromonas* sp. Strains P1-7a, P1-9, P1-13-1a, P1-  
18 16-1b, P1-25 and P1-26, which Induce Larval Settlement and Metamorphosis in  
19 *Hydractinia echinata*. *Genome Announc.* **3**, e01477-15 (2015).
- 20 26. M. Rischer, J.-L. Klassen, T. Wolf, H. Guo, E. Shelest, J. Clardy, C. Beemelmans, Draft  
21 Genome Sequence of *Shewanella* sp. P1-14-1, a Bacterial Inducer of Settlement and  
22 Morphogenesis in Larvae of the Marine Hydroid Hydractinia Echinata. *Genome Announc*  
23 **4**(1), e00003-16 (2016).
- 24 27. J.-L. Klassen, M. Rischer, T. Wolf, H. Guo, E. Shelest, J. Clardy, C. Beemelmans,  
25 Genome Sequences of Three *Pseudoalteromonas* Strains P1-8, P1-11 and P1-30  
26 Isolated from the Marine Hydroid *Hydractinia echinata*. *Genome Announc.* **3**, e01380-15  
27 (2015).
- 28 28. M. Wang, J. J. Carver, V. V. Phelan, L. M. Sanchez, N. Garg, Y. Peng, D. D. Nguyen et  
29 al. "Sharing and community curation of mass spectrometry data with Global Natural  
30 Products Social Molecular Networking." *Nature Biotechnology* **34**, 8, 828 (2016).
- 31 29. H. Sunshine, M. L. Iruela-Arispe, Membrane lipids and cell signaling, *Curr. Opin. Lipidol.*  
32 **28**, 408–413 (2017)
- 33 30. L. Zheng, Y. Lin, S. Lu, J. Zhang, M. Bogdanov, Biogenesis, Transport and Remodeling  
34 of Lysophospholipids in Gram-negative Bacteria. *Biochim. Biophys. Acta. Mol. Cell. Biol.*  
35 *Lipids.* **862**, 1404-1413 (2017).
- 36 31. K. Makide, H. Kitamura, Y. Sato, M. Okutani, J. Aoki, Emerging lysophospholipid  
37 mediators, lysophosphatidylserine, lysophosphatidylthreonine,  
38 lysophosphatidylethanolamine and lysophosphatidylglycerol. *Prostag. Oth. Lipid M.* **89**,  
39 135-139 (2009).
- 40 32. R. Zhang, K. J. Edgar, Properties, chemistry, and applications of the bioactive  
41 polysaccharide curdlan, *Biomacromolecules* **15**, 1079–1096 (2014)
- 42 33. G. Raposo, W. Stoorvogel, Extracellular vesicles: exosomes, microvesicles, and friends.  
43 *J. Cell Biol.* **200**, 373–383 (2013).
- 44 34. S.-J. Biller, F. Schubotz, S.-E. Roggensack, A.-W. Thompson R.-E. Summons, S.-W.  
45 Crisholm, Bacterial vesicles in marine ecosystems. *Science.* **343**, 183–186 (2014).
- 46 35. J. Lynch, R.-A. Alegado, Spheres of hope, orbs of doom: the good and bad of outer  
47 membrane vesicles in interspecies dynamics, *J. Bacteriol.* **199**, e00012-17 (2017).
- 48 36. E. Maunders, M. Welch, Matrix exopolysaccharides; the sticky side of biofilm formation.  
49 *FEMS Microbiol. Lett.* **364**, fnx120 (2017).
- 50 37. M.-B. Lilledahl, B.-T. Stokke, Novel imaging technologies for characterization of microbial  
51 extracellular polysaccharides. *Front. Microbiol.* **6**, 525 (2015).
- 52 38. D. Parkar, R. Jadhav, M. Pimpliskar, Marine bacterial extracellular polysaccharides. *J.*  
53 *Coast. Life. Med.* **5**, 29-35 (2007).

- 1 39. R.-A. Alegado, L.-W. Brown, S. Cao, R.-K. Dermenjian, R. Zuzow, S.-R. Fairclough, J.  
2 Clardy, N. King, A bacterial sulfonolipid triggers multicellular development in the closest  
3 living relatives of animals. *eLife*. **1**, e00013 (2012).
- 4 40. C. Beemelmans, A. Woznica, R.-A. Alegado, A.-M. Cantley, N. King, J. Clardy,  
5 Synthesis of the rosette-inducing factor RIF-1 and analogs. *J. Am. Chem. Soc.* **136**,  
6 10210-10213 (2014).
- 7 41. A. Woznica, A.-M. Cantley, C. Beemelmans, E. Freinkman, J. Clardy, N. King, Bacterial  
8 lipids activate, synergize, and inhibit a developmental switch in choanoflagellates. *Proc.*  
9 *Natl. Acad. Sci. U S A.* **12**, 113, 7894-7899 (2016).
- 10 42. J. He, Q. Dai, Y. Qi, P. Su, M. Huang, C. Ke, D. Feng, Bacterial nucleobases  
11 synergistically induce larval settlement and metamorphosis in the invasive mussel  
12 *Mytilopsis sallei*. *Appl. Environ. Microbiol.* doi:10.1128/AEM.01039-19 (2019).
- 13 43. N.-A. Komandrova, M.-S. Kokoulin, A.-I. Kalinovskiy, S.-V. Tomshich, L.-A. Romanenko,  
14 V.-E. Vaskovsky, The O-specific polysaccharide from the marine bacterium  
15 *Pseudoalteromonas agarivorans* KMM 255T. *Carbohydrate research, Carbohydr. Res.*  
16 **414**, 60-4 (2015).
- 17 44. D.-H. Limoli, C.-J. Jones, D.-J. Wozniak, Bacterial extracellular polysaccharides in biofilm  
18 formation and function. *Microbiol. Spectr.* **3** (2014).
- 19 45. A. Casillo, R. Lanzetta, M. Parrilli, M. M. Corsaro, Exopolysaccharides from Marine and  
20 Marine Extremophilic Bacteria: Structures, Properties, Ecological Roles and Applications.  
21 *Mar. Drugs* **16**, E69 (2018)
- 22 46. Y.-C. Yung, N.-C. Stoddard, H. Mirendil, J. Chun, Lysophosphatidic Acid signaling in the  
23 nervous system. *Neuron*. **85**, 669-682 (2015).
- 24 47. G. Amador-Cano, E. Carpizo-Ituarte, D. Cristino-Jorge D, Role of protein kinase C, G-  
25 protein coupled receptors, and calcium flux during metamorphosis of the sea urchin  
26 *Strongylocentrotus purpuratus*. *Biol Bull.* **210**, 121-131 (2006).
- 27 48. G. Henningi, D.-K. Hofmann, Y.-B. Yahu, Metamorphic processes in the soft corals  
28 *Heteroxenia fuscescens* and *Xenia umbellata*: The effect of protein kinase C activators  
29 and inhibitors. *Invertebr. Reprod. Dev.* **34**, 35-45 (1998).
- 30 49. M.-E. Lin, D. R. Herr, J. Chun, Lysophosphatidic acid (LPA) receptors: signaling  
31 properties and disease relevance. *Prostaglandins Other Lipid Mediat.* **91**, 130-138  
32 (2010).
- 33 50. P. Albersheim, A.-G. Darvill, M. McNeil, B.-S. Valent, J.-K. Sharp, E.-A. Nothnagel, K.-R.  
34 Davis, "Oligosaccharins: Naturally occurring carbohydrates with biological regulatory  
35 functions", in Structure and Function of Plant Genomes, O. Ciferri, L. Durell, Eds  
36 (Springer, 1983), pp. 293-312.
- 37 51. U. Szewzyk, C. Holmström, M. Wrangstadh, Relevance of the exopolysaccharide of  
38 marine *Pseudomonas* sp. S9 for the attachment of *Ciona intestinalis* larvae. *Ecol.*  
39 *Progress. Ser.* 259-265 (1991).
- 40 52. J. Soza-Ried, A. Hotz-Wagenblatt, K.-H. Glatting, C. del Val, K. Fellenberg, H. R. Bode,  
41 U. Frank, J. D. Hoheisel, M. Frohme, The transcriptome of the colonial marine hydroid  
42 *Hydractinia echinata*. *FEBS J* **277**, 197-209 (2009).
